# Supplementary material for: Propagation of errors in citation networks: a study involving the entire citation network of a widely cited paper published in, and later retracted from, the journal Nature
Source: PubMed Central journal article supplement (PMC5793988; doi:10.1186/s41073-016-0008-5), 2016-05-03

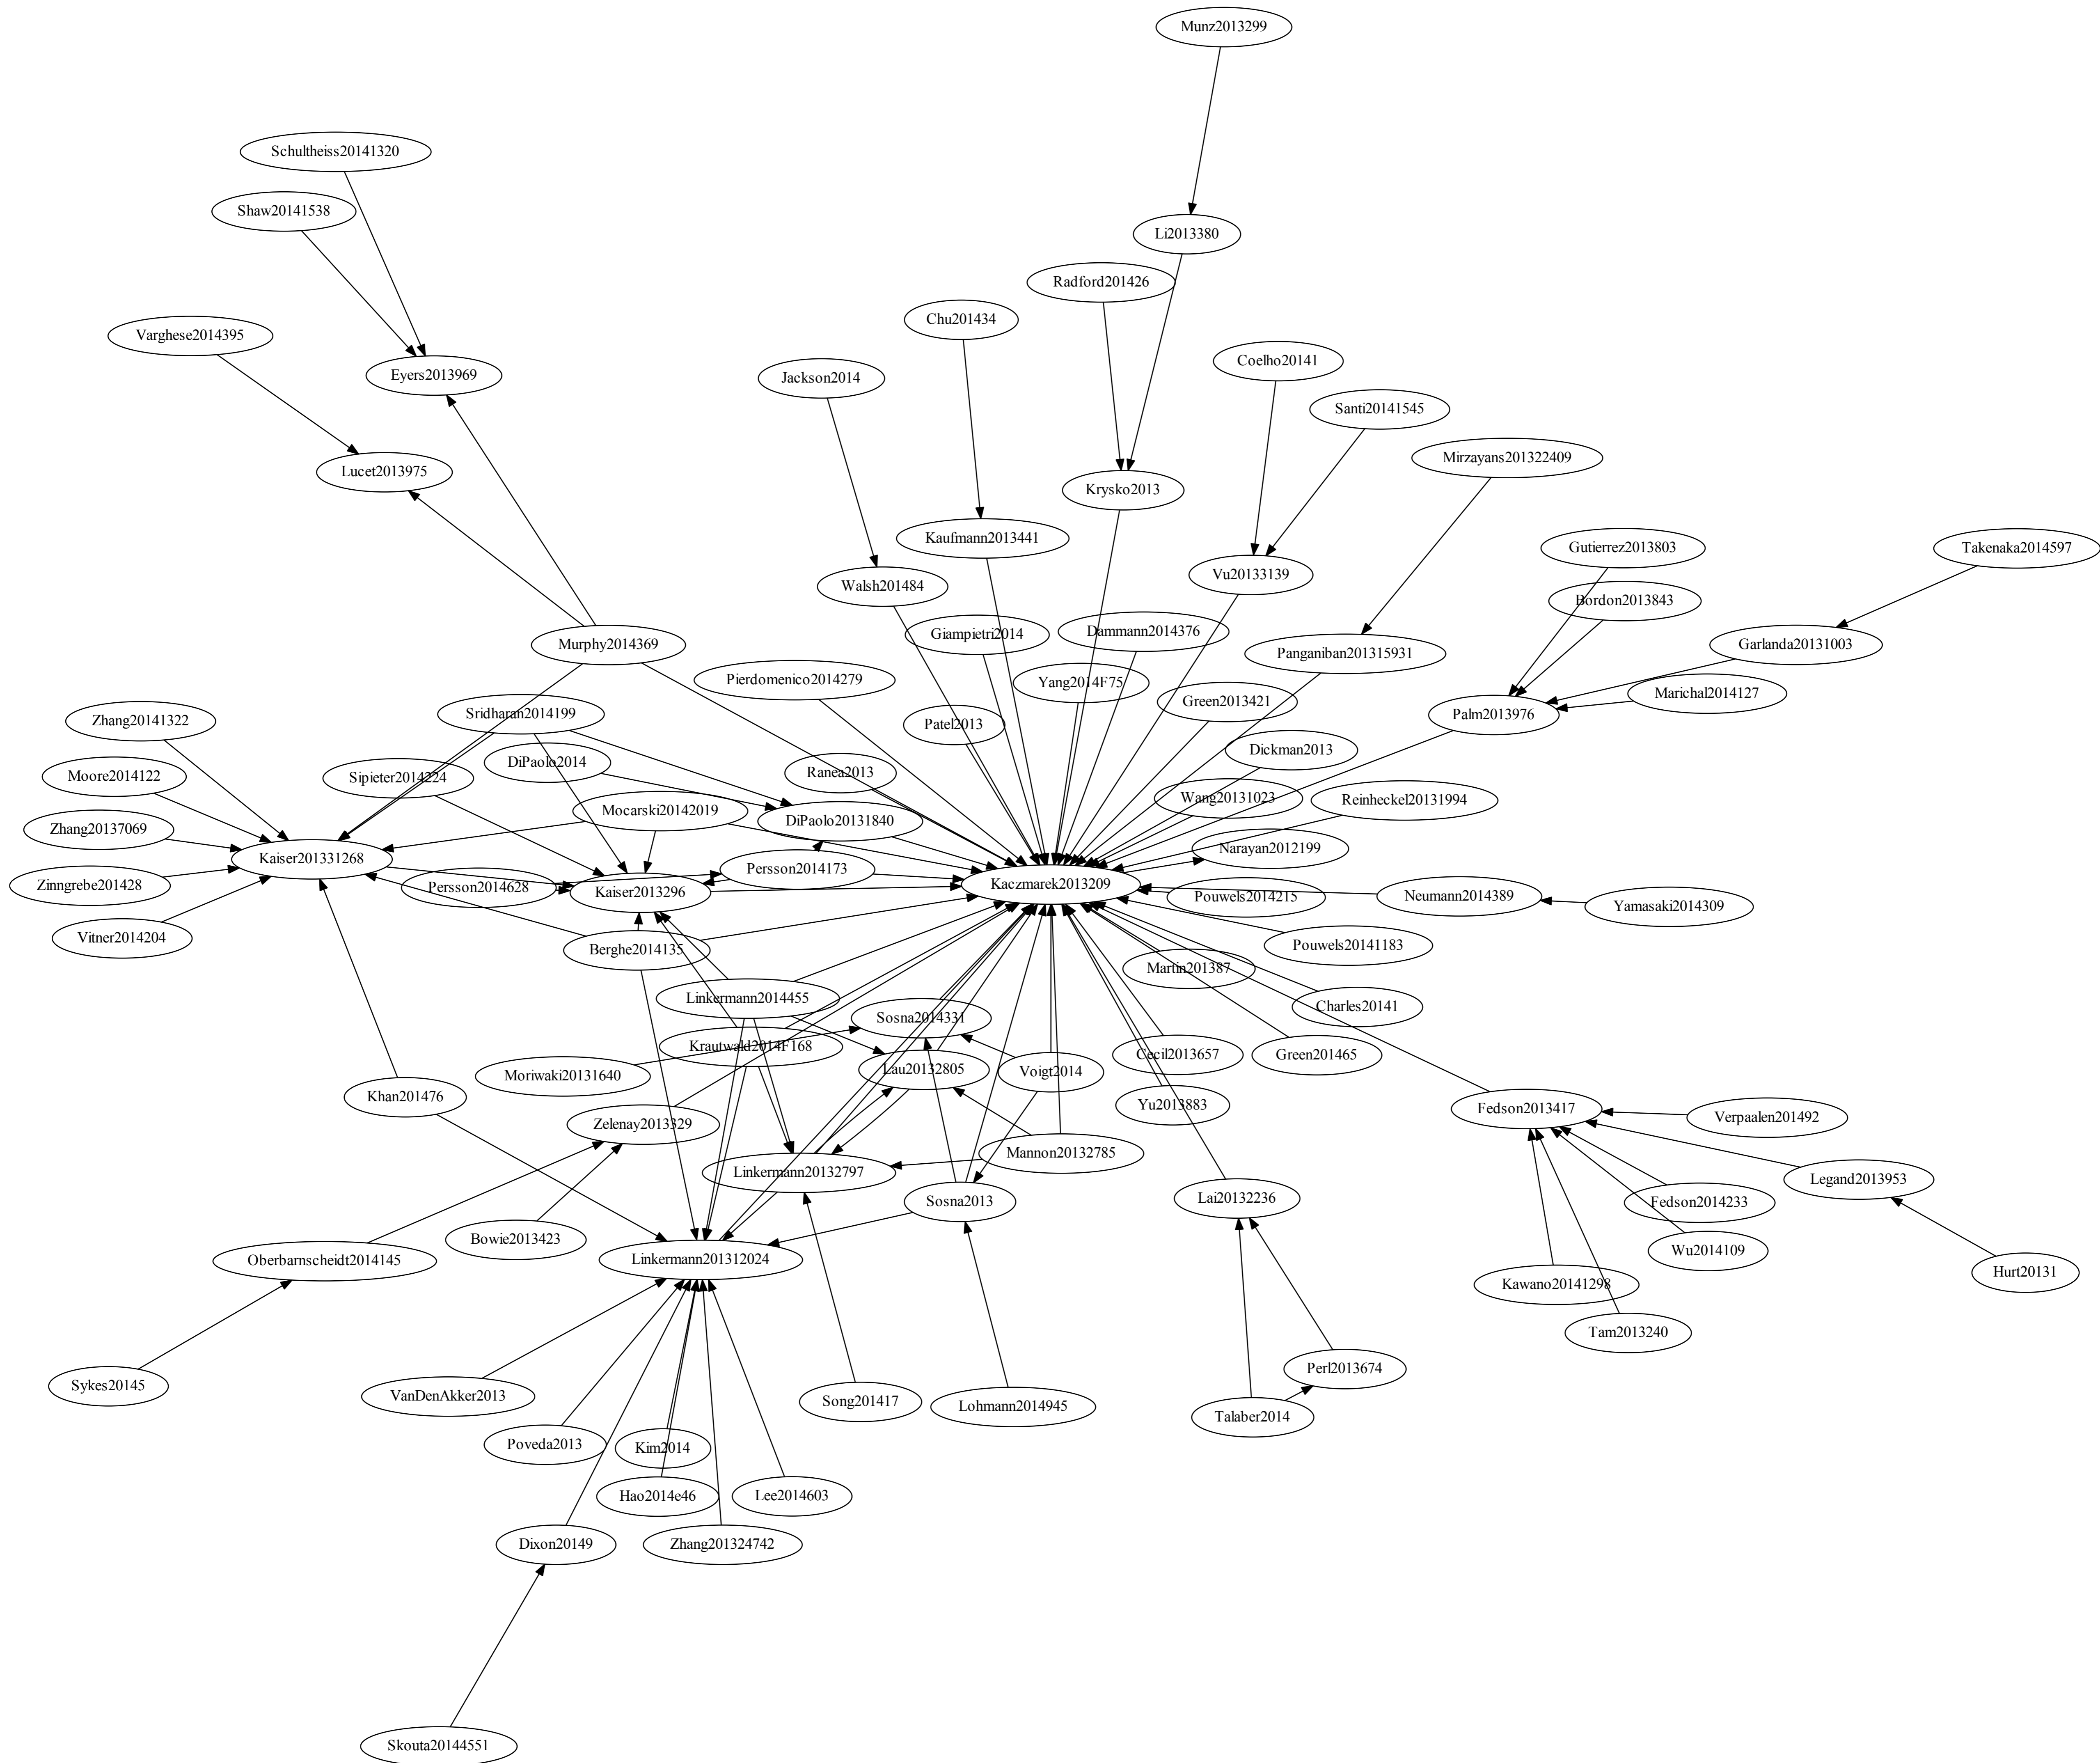

Supplement: 41073_2016_8_MOESM5_ESM.pdf [file 41073_2016_8_MOESM5_ESM.pdf]
